# Supplementary material
Source: HighWire-hosted journal article supplement (https://gut.bmj.com/content/70/9/1698)
Supplement: inline-supplementary-material-2 [file inline-supplementary-material-2.xlsx]

## Sheet: Tabel 1
Table 1. Demographic characteristics of 130 patients with colorectal cancer.
Characteristics	Value (N=130)
Sex, N. (%)
Male	55(42.31%)
Female	75 (57.69%)
Age Group, y, N. (%)
< 60	42 (32.31%)
60 - 69	35 (26.92%)
70 - 79	38 (29.23%)
≥ 80	15 (11.54%)
Pathologic Stage, N. (%)
I - II	12 (9.23%)
II	88 (67.69%)
II - III	19 (14.62%)
III	11 (8.46%)
Tumor Localization, N. (%)
Left Colon	6 (4.62%)
Right Colon	37 (28.46%)
Sigmoid	46 (35.38%)
Ascending Colon	12 (9.23%)
Descending Colon	9 (6.92%)
Ileocecus	9 (6.92%)
Others	11 (8.46%)
Pathological Morphology, N. (%)
Infiltrating	14 (10.77%)
Ulcerative	65 (50.00%)
Protruded	29 (22.31%)
Unknown	22 (16.92%)
Sites of Metastases, N. (%)
Liver	9 (6.92%)
Leritoneum	1 (0.77%)
Liver and Pelvic	1 (0.77%)
Spleen	1 (0.77%)
Omentum	2 (1.54%)
BRAF Mutation (V600E), N. (%)
Mutated Type	6 (4.62%)
Wild Type	74 (56.92%)
Unknown	50 (38.46%)
KRAS Mutation, N. (%)
Mutated Type	31 (20.67%)
Wild Type	49 (37.69%)
Unknown	50 (38.46%)
